# Supplementary material for: A cork based substrate coupled with artificial antibodies for point-of-care detection of pro-inflammatory cytokine biomarkers
Source: Royal Society of Chemistry journal article supplement (doi:10.1039/d3sd00022b), 2023-01-01
Supplement: d3sd00022b1.pdf [file d3sd00022b1.pdf]

## Supplementary information

### **Cork based substrate coupled with artificial antibodies for point-of-care detection of pro-inflammatory cytokine biomarker**

Bárbara Correia,<sup>a#</sup> Daniela Oliveira <sup>a#</sup>, Georgeta Vulpe <sup>b</sup>, Ana P.M. Tavares <sup>c</sup>, M. Goreti F. Sales <sup>c</sup>, Abel J. Duarte<sup>d</sup>, Sanjiv Sharma <sup>b\*</sup> and Felismina T.C. Moreira <sup>a\*</sup>

*Affiliation:*

<sup>a</sup> BioMark@ISEP-CEB/LABELS, School of Engineering, Polytechnic of Porto, R. Dr. António Bernardino de Almeida, 431, 4249-015 Porto, Portugal

<sup>b</sup> Department of Biomedical Engineering, Faculty of Science and Engineering, Swansea University, Swansea SA1 8EN (UK)

<sup>c</sup> BioMark@UC-CEB/LABELS, Faculty of Sciences and Technology, University of Coimbra, R. Sílvio Lima, Pólo II, 3030-790 Coimbra, Portugal

<sup>d</sup> REQUIMTE, School of Engineering, Polytechnic Institute of Porto, Porto, 4200-072, Portugal

*\* To whom correspondence should be addressed:*

Sanjiv Sharma email: sanjiv.sharma@swansea.ac.uk & Felismina Moreira email: ftm@isep.ipp.pt

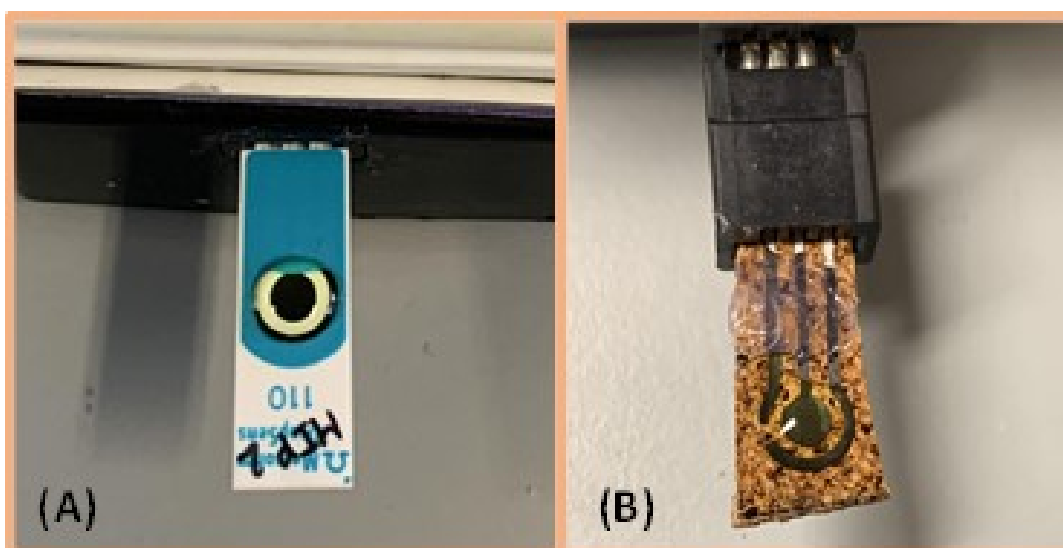

**Figure S1** - Commercial electrode (C-110) (A) and homemade cork electrode (cork-SPE) (B).

### C-SPE

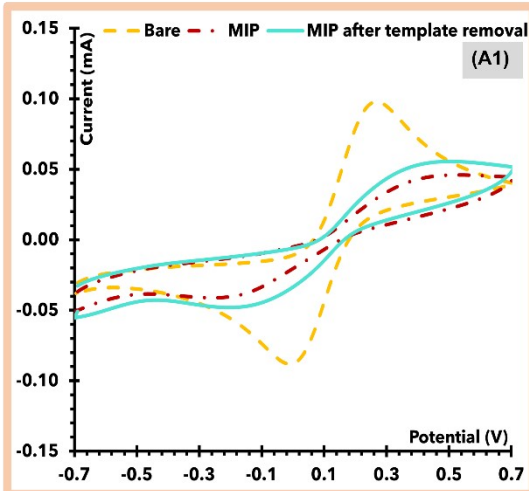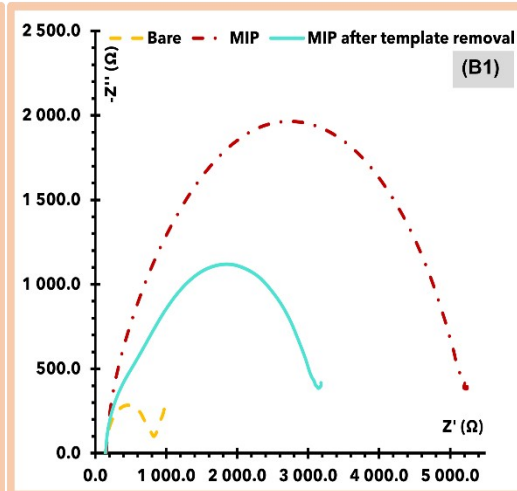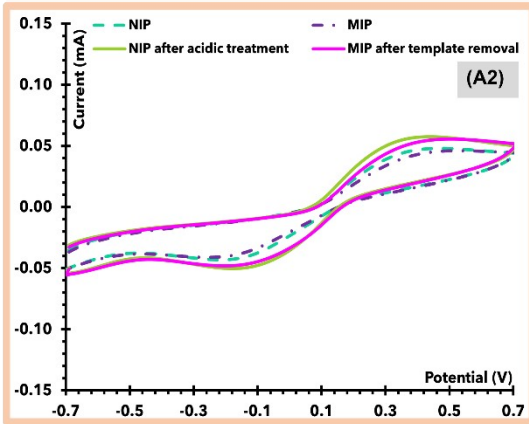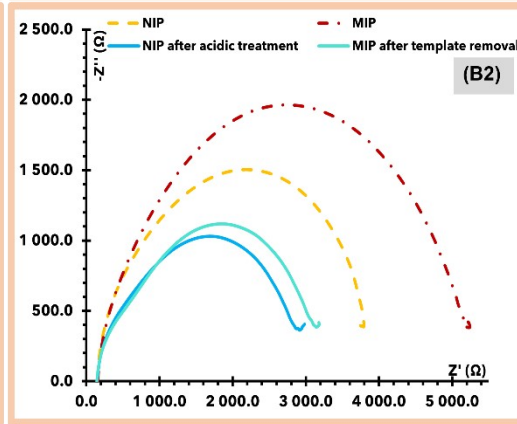

### cork-SPE

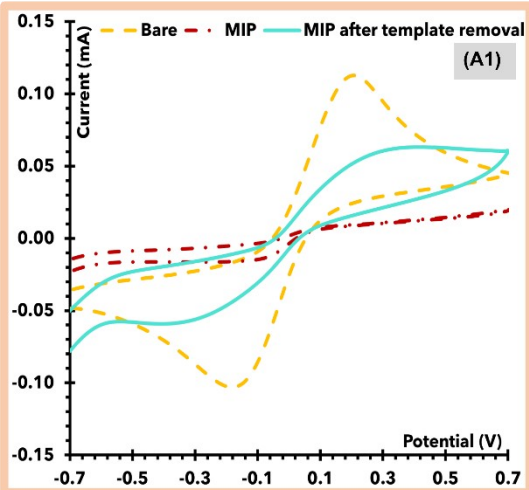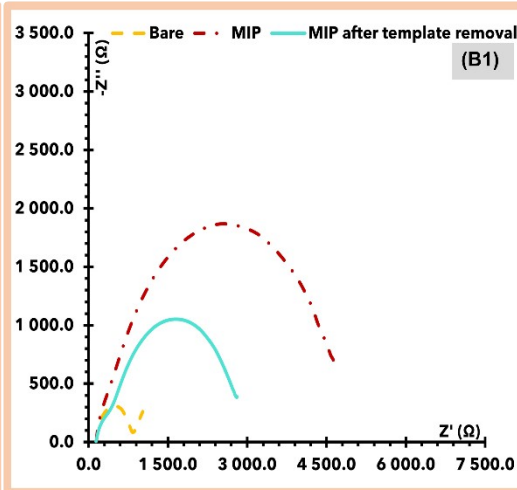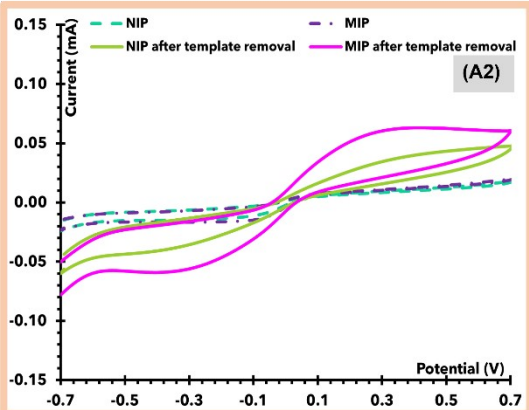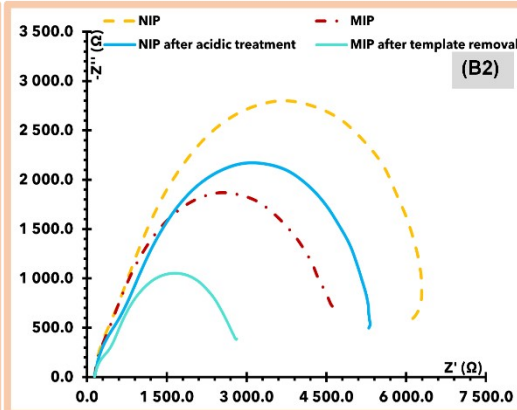

**Figure S2** – Electrochemical follow up of the synthesis of the MIP and NIP materials. ( A1 and B1 - CV and EIS readings after electropolymerization of MIP, A2 and B2 readings after electropolymerization and template removal of MIP and NIP, in C-SPE); ( A1 and B1 - CV and EIS readings after electropolymerization of MIP, A2 and B2 readings after electropolymerization and template removal of MIP and NIP, in cork-SPE).

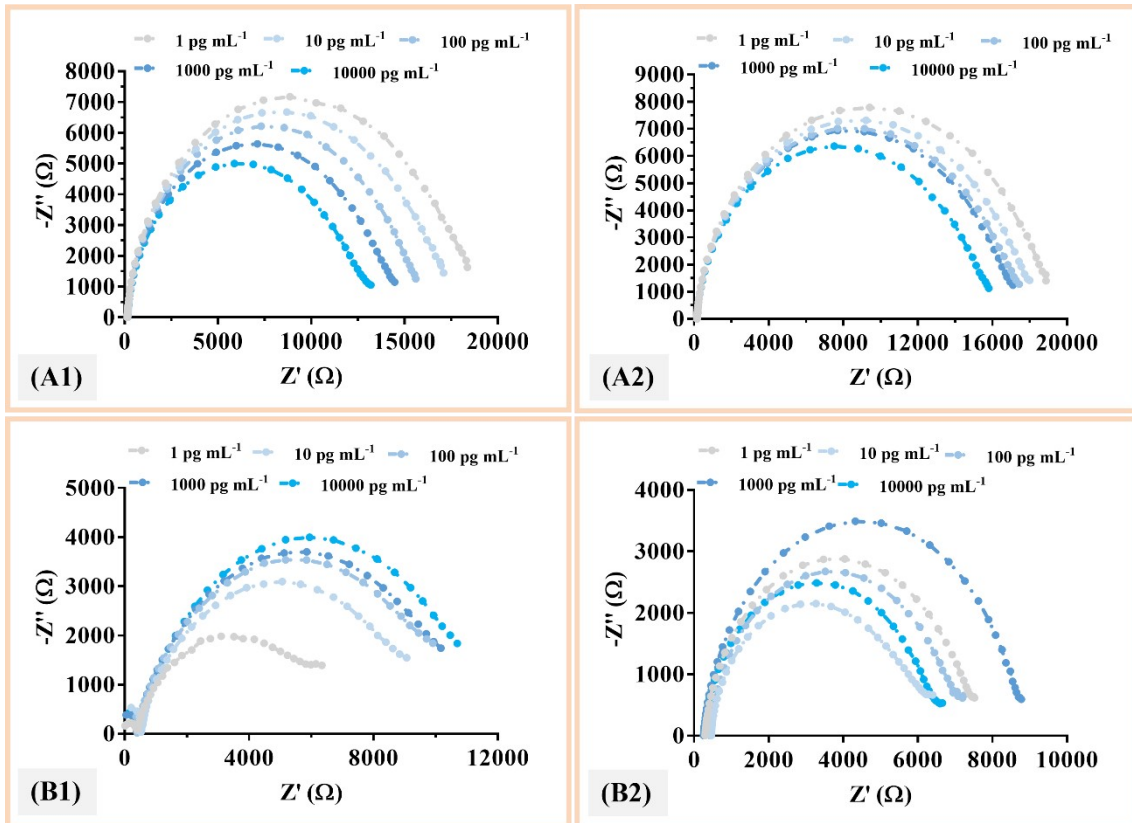

**Figure S3** – EIS spectra with different concentration of IL-6 in spiked serum samples diluted 1000-fold in MIP and NIP sensors on commercial electrodes C-SPE (A1 and B1) and cork-SPE (A2 and B2). Measurements were performed 5 mM  $K_3[Fe(CN)_6]$  and  $K_4[Fe(CN)_6]$  prepared in 0.1 M KCl.

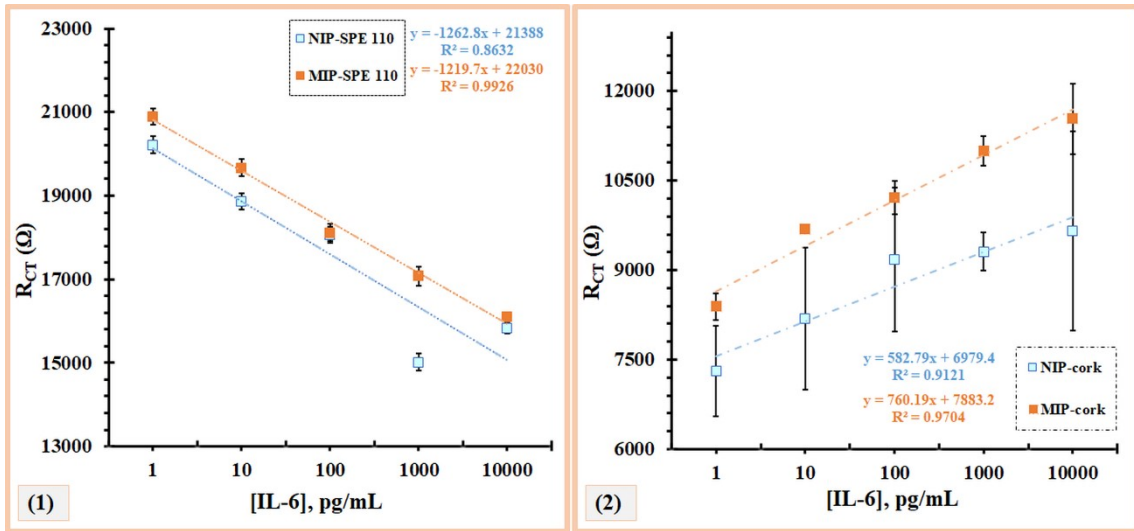

**Figure S4** – Calibration curve of commercial electrodes (1) (C-SPE) and homemade cork electrodes (cork-SPE) with different concentration of IL-6 in spiked serum samples diluted 1000—fold.
